# Supplementary material
Source: PubMed Central journal article supplement (PMC5926825)
Supplement: NIHMS940411-supplement-311401_Review_Online.pdf [file NIHMS940411-supplement-311401_Review_Online.pdf]

## Supplemental Table I. ROS and Atherosclerosis

| Gene/Protein | Experimental Mouse Background                                                                                      | Diet/Intervention                | Effect                                                                                       |
|--------------|--------------------------------------------------------------------------------------------------------------------|----------------------------------|----------------------------------------------------------------------------------------------|
| Catalase     | 1. Cat overexpression, ApoE <sup>-/-267</sup><br>2. Cat + SOD1 overexpression, ApoE <sup>-/-267</sup>              | Standard chow (5-6 months)       | ↓ Aortic lesion area (total)                                                                 |
|              | 1. mitoCat BM→ Ldlr <sup>-/-259</sup><br>2. mCAT <sup>fllox/</sup> LysMCre <sup>+/-</sup> , Ldlr <sup>-/-259</sup> | WTD (8 weeks)                    | ↓ Aortic sinus lesion<br>↓ Inflammatory signaling<br>↓ Monocyte infiltration                 |
|              | MitoCat BM→ Ldlr <sup>-/-</sup> (36 weeks old) <sup>260</sup>                                                      | WTD (14 weeks)                   | ↓ Aortic sinus lesion<br>↓ Neutrophil extracellular traps                                    |
| G6PD         | G6PD <sup>-/-</sup> , ApoE <sup>-/-256</sup>                                                                       | WTD (11 weeks)                   | ↓ O <sub>2</sub> production                                                                  |
| GPX          | GPX1 <sup>-/-</sup> , ApoE <sup>-/-271</sup>                                                                       | WTD (12 and 24 weeks)            | - 12 weeks aortic lesion area<br>↑ 24 weeks aortic lesion area<br>↑ Macrophage proliferation |
|              | GPX1 <sup>-/-</sup> , ApoE <sup>-/-272</sup>                                                                       | STZ (14 and 20 weeks)            | ↑ Aortic lesion area<br>↑ Inflammatory markers                                               |
| NOX1         | NOX1 <sup>-ly</sup> , ApoE <sup>-/-228,229</sup>                                                                   | HFD (18 weeks)                   | ↓ Aortic lesion area (sinus and thoracic)<br>↓ Macrophage infiltration                       |
|              | NOX1 <sup>-ly</sup> , ApoE <sup>-/-233</sup>                                                                       | WTD (7, 14 and 21 weeks)         | - Total aortic lesion<br>↑ Aortic sinus lesion<br>↓ Collagen<br>↑ MMP                        |
|              | NOX4 <sup>-/-</sup> , ApoE <sup>-/-229,246</sup>                                                                   | STZ (10 weeks)                   | ↓ Aortic sinus lesion<br>↓ T-cell recruitment<br>↓ Inflammatory markers                      |
| NOX2         | NOX2 <sup>-ly</sup> , ApoE <sup>-/-226</sup>                                                                       | WTD (7 and 14 weeks)             | ↓ Cholesterol<br>↓ Lesion area (sinus and whole aorta)                                       |
|              | EC NOX2 overexpression, ApoE <sup>-/-235</sup>                                                                     |                                  | - Aortic sinus lesion<br>↑ Inflammatory markers<br>↑ Macrophage infiltration                 |
|              | NOX1 <sup>-ly</sup> , ApoE <sup>-/-230,246</sup>                                                                   | STZ Injection (10 and 20 weeks)  | ↓ Aortic sinus lesion<br>↓ Macrophage infiltration<br>↓ Collagen I                           |
|              | NOX2 <sup>-ly</sup> , ApoE <sup>-/-223</sup>                                                                       | Atherogenic diet (20 weeks)      | ↓ Triglycerides<br>↓ Cholesterol<br>- Aortic sinus lesion                                    |
| NOX4         | NOX4 <sup>-/-</sup> , ApoE <sup>-/-230</sup>                                                                       | STZ (20 weeks)                   | ↑ Aortic lesion area (total)<br>↑ Macrophage infiltration<br>↑ Collagen I & III              |
|              | NOX4 <sup>-/-</sup> , Ldlr <sup>-/-244</sup>                                                                       | HFD (20 weeks)                   | ↑ Aortic sinus lesion<br>↑ Collagen<br>EC dysfunction                                        |
|              | Nox4 <sup>fllox/fllox</sup> -Cre-ERT2 <sup>+0</sup> , ApoE <sup>-/-245</sup>                                       | Standard chow (9 months)         | ↑ Aortic lesion area (total)<br>↑ Collagen<br>↑ Monocyte infiltration                        |
|              | EC Nox4 <sup>DN</sup> , ApoE <sup>-/-247</sup>                                                                     | STZ (10 weeks)<br>WTD (14 weeks) | ↑ Aortic sinus lesion                                                                        |
|              | SMC Nox4 <sup>DN</sup> , ApoE <sup>-/-251</sup>                                                                    | WTD (14 weeks)                   | ↓ Aortic sinus lesion                                                                        |

|                     |                                                                                                                                                                                                                                  |                                                                                               |                                                                             |
|---------------------|----------------------------------------------------------------------------------------------------------------------------------------------------------------------------------------------------------------------------------|-----------------------------------------------------------------------------------------------|-----------------------------------------------------------------------------|
| NRF2                | NRF2 <sup>-/-</sup> , ApoE <sup>-/-270</sup>                                                                                                                                                                                     | Standard chow (14 weeks)                                                                      | ↓ Aortic sinus lesion<br>↓ Cholesterol efflux<br>↓ Lipid uptake             |
| p47 <sup>phox</sup> | p47 <sup>phox-/-</sup> , ApoE <sup>-/-224</sup>                                                                                                                                                                                  | Standard Chow                                                                                 | – Aortic sinus lesion                                                       |
|                     | p47 <sup>phox-/-</sup> , ApoE <sup>-/-225,236</sup>                                                                                                                                                                              | Standard chow (30 weeks)<br>HFD (10 weeks)<br>WTD (NSL)                                       | ↓ Whole aorta lesion (all diet types)                                       |
|                     | 1. p47 <sup>phox-/-</sup> BM → p47 <sup>phox+/+</sup> , ApoE <sup>-/-</sup><br>(BM knockout) <sup>236</sup><br>2. p47 <sup>phox+/+</sup> BM → p47 <sup>phox-/-</sup> , ApoE <sup>-/-</sup><br>(Vascular knockout) <sup>236</sup> | WTD (12 weeks)                                                                                | ↓ Total aorta lesion<br>↓ Macrophage infiltration<br>↓ Inflammatory markers |
| PRDX                | 1. PRDX1 <sup>-/-274</sup><br>2. PRDX1 <sup>-/-</sup> , ApoE <sup>-/-274</sup>                                                                                                                                                   | Standard chow (4 months)                                                                      | ↑ Leukocyte rolling<br>↑ Aortic sinus lesion<br>↑ Macrophage infiltration   |
|                     | PRDX4 overexpression, ApoE <sup>-/-268</sup>                                                                                                                                                                                     | HCD (12 weeks)                                                                                | ↓ Aortic lesion area (total)<br>↑ Smooth muscle and collagen<br>↓ T-cell    |
|                     | PRDX2 <sup>-/-</sup> , ApoE <sup>-/-275</sup>                                                                                                                                                                                    | Atherogenic cholate diet (10 weeks)                                                           | ↑ Aortic lesion area (total)<br>↑ Inflammatory signaling                    |
| SOD                 | SOD2 <sup>-/+</sup> , ApoE <sup>-/-273</sup>                                                                                                                                                                                     | Standard chow (17 and 34 weeks)                                                               | ↑ Aortic lesion area (total)                                                |
| TRX                 | EC TRX overexpression, ApoE <sup>-/-269</sup>                                                                                                                                                                                    | Atherogenic diet (8 weeks)                                                                    | ↓ Aortic lesion area (total)                                                |
| UCP2                | 1. UCP2 <sup>-/-263</sup><br>2. UCP2 <sup>-/-</sup> BM → Ldlr <sup>-/-264</sup>                                                                                                                                                  | 1. Atherogenic diet (14 weeks) <sup>263</sup><br>2. Atherogenic diet (7 weeks) <sup>264</sup> | ↑ Aortic sinus lesion<br>↑ Macrophage infiltration                          |

Contribution of ROS regulating enzymes in the development of atherosclerosis. WTD=western-type diet, STZ= streptozotocin, HFD=high-fat diet, HCD=high-cholesterol diet.

## Supplemental Table II. ROS and Diabetes

| Gene/Protein       | Mouse Genotype                                                                                            | Diet/Intervention                                     | Effect                                                                      |
|--------------------|-----------------------------------------------------------------------------------------------------------|-------------------------------------------------------|-----------------------------------------------------------------------------|
| Vascular Tone      |                                                                                                           |                                                       |                                                                             |
| p66 <sup>shc</sup> | 1. p66 <sup>shc</sup> <sup>-/-291</sup><br>2. p66 <sup>shc(K81R)</sup> (dominant negative) <sup>293</sup> | STZ                                                   | ↑ EC-dependent relaxation<br>↑ eNOS activity                                |
| NOX2               | NOX2 <sup>-/-</sup> (7 month old) <sup>296</sup>                                                          | HFD (11 weeks)                                        | ↑ Glucose tolerance<br>↓ Obesity<br>↑ EC-dependent relaxation               |
|                    | db/db                                                                                                     | p22 <sup>phox</sup> siRNA iv injection <sup>298</sup> | ↑ EC-dependent relaxation                                                   |
|                    | NOX2 <sup>-/-</sup> , ESMIRO <sup>299</sup>                                                               |                                                       | ↑ Vasomotor function                                                        |
|                    | 1. NOX2 <sup>-/-304</sup><br>2. NOX2 <sup>-/-</sup> BM –MNCs → NOX2 <sup>+/+304</sup>                     | STZ (8 weeks) followed by femoral artery ligation     | ↑ Post-ischemic neovascularization                                          |
| NOX1               | NOX1 <sup>-/-y</sup> , db/db <sup>297</sup>                                                               |                                                       | ↑ EC-dependent relaxation<br>↑ EC-independent relaxation<br>↑ myogenic tone |

Contribution of ROS regulating enzymes in diabetic vascular dysfunction.
